# Supplementary material for: All-Sky 1 km MODIS Land Surface Temperature Reconstruction Considering Cloud Effects Based on Machine Learning
Source: MDPI journal article supplement (doi:10.3390/rs14081815), 2022-04-09
Supplement: s1 [file s1]

Archive with 1 entries (1 files):
- remotesensing-1610791-supplementary.pdf
