# Supplementary material for: All-Sky 1 km MODIS Land Surface Temperature Reconstruction Considering Cloud Effects Based on Machine Learning
Source: MDPI journal article supplement (doi:10.3390/rs14081815), 2022-04-09
Supplement: s1 [file s1 › remotesensing-1610791-supplementary.pdf]

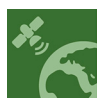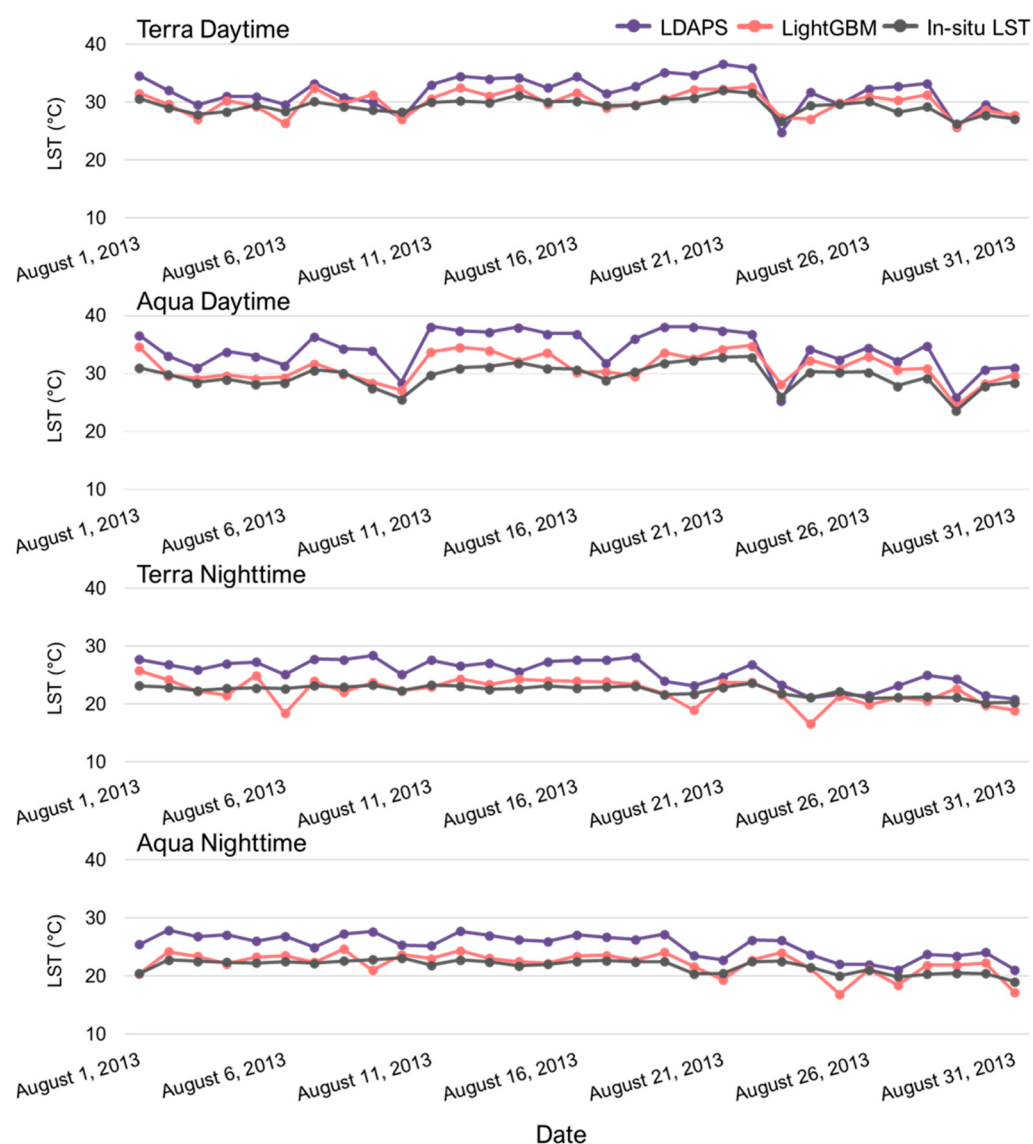

**Figure S1.** Time-series of the LST estimated by the LDAPS and LightGBM models, and bias-corrected in situ LST at station 8 for four MODIS view times during August 2013.

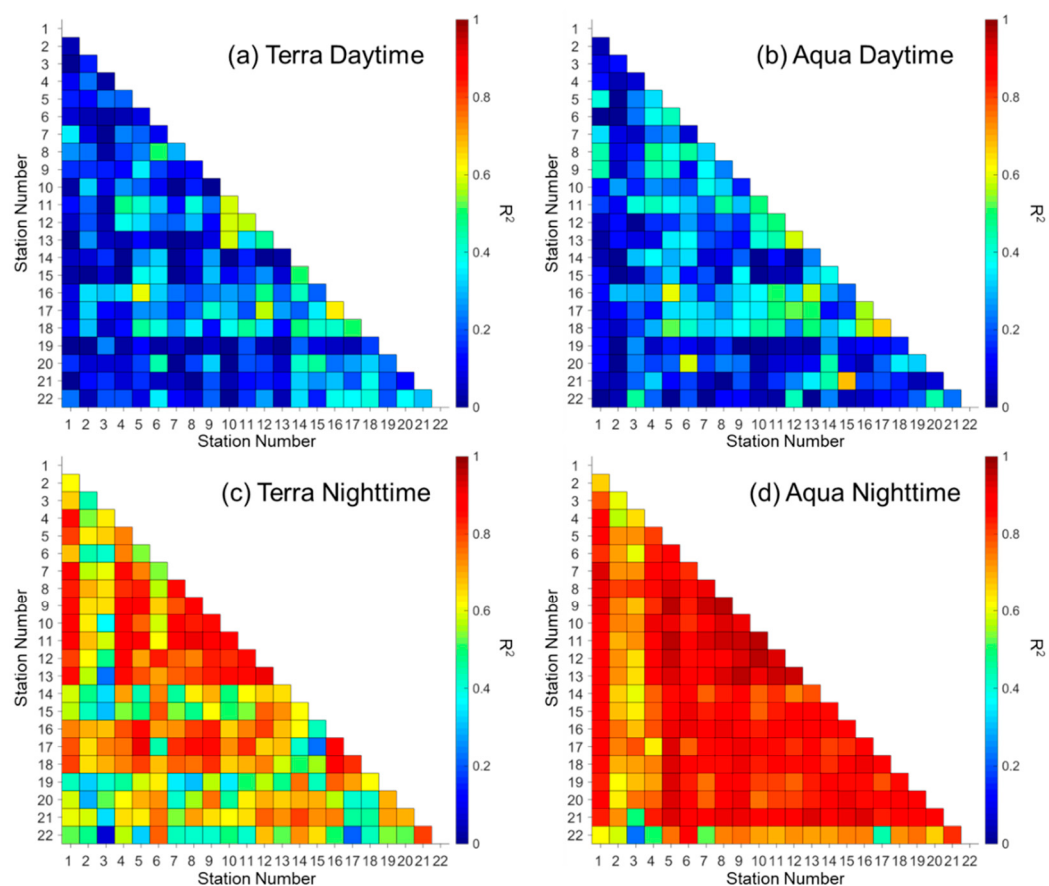

**Figure S2.** Temporal  $R^2$  between the clear-sky LSTs observed at 22 ASOS stations for four MODIS view times during June-August from 2013 to 2020.

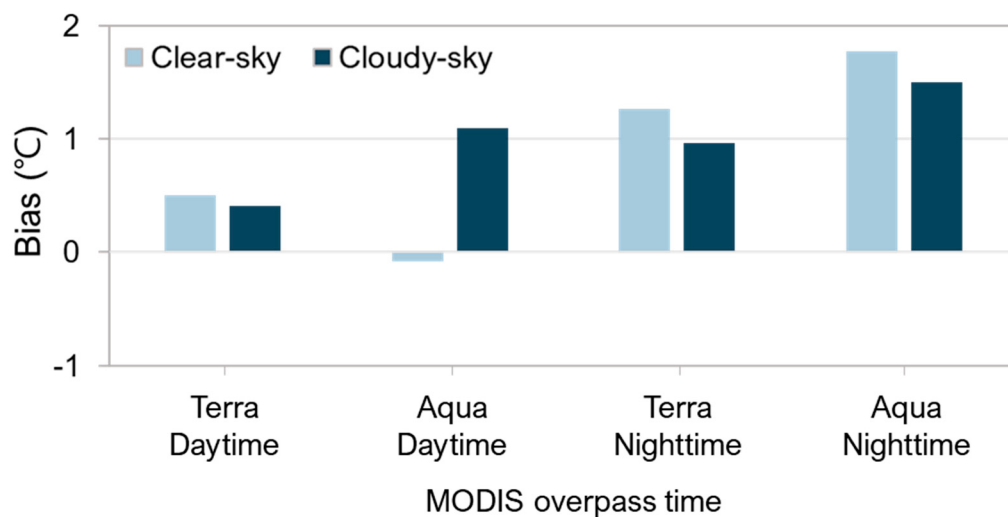

**Figure S3.** The bias of the LDAPS LST calculated using the 22 bias-corrected in situ observations during June-August from 2013 to 2020 at each MODIS view time.
